# Supplementary material
Source: PubMed Central journal article supplement (PMC4156716)
Supplement: 1402875111_pnas.201402875SI.pdf [file 1402875111_pnas.201402875SI.pdf]

# Supporting Information

Perry et al. 10.1073/pnas.1402875111

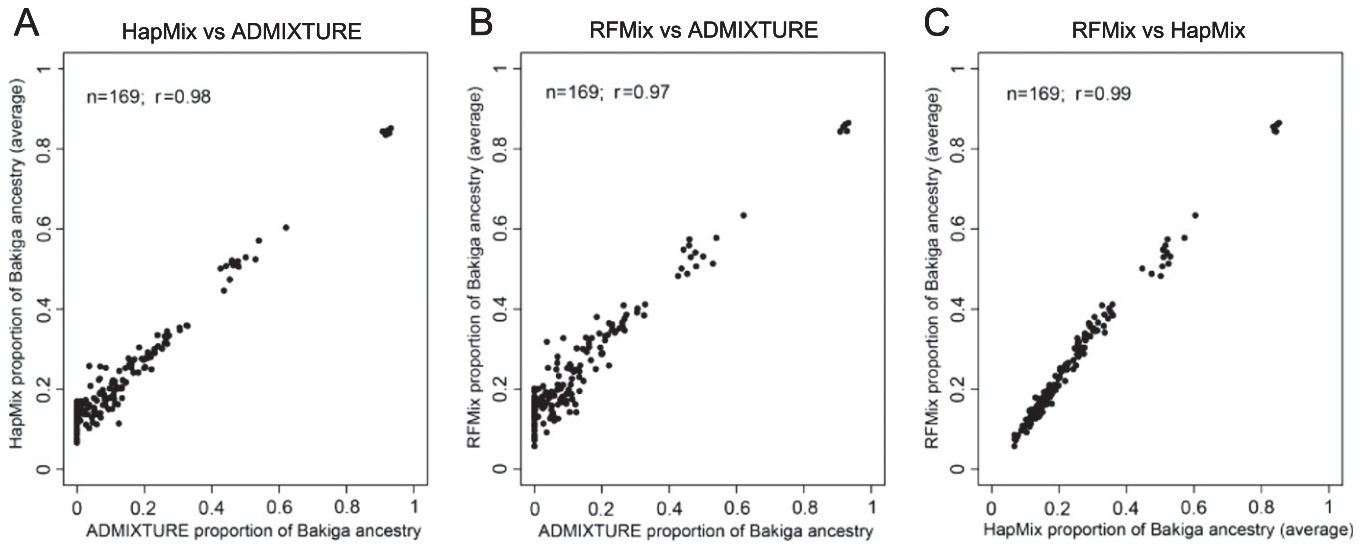

**Fig. S1.** Correlation between ADMIXTURE and average HapMix and RFMix ancestry estimates. (A) Correlation between the levels of Bakiga ancestry among all Batwa individuals estimated using ADMIXTURE (x axis) and those obtained when averaging local ancestry proportions across all SNPs using HAPMIX (y axis). (B) Correlation between the levels of Bakiga ancestry among all Batwa individuals estimated using ADMIXTURE (x axis) and those obtained when averaging local ancestry proportions across all SNPs using RFMix (y axis). (C) Correlation between the levels of Bakiga ancestry among all Batwa individuals estimated by ADMIXTURE (x axis) and those estimated by HAPMIX (y axis).

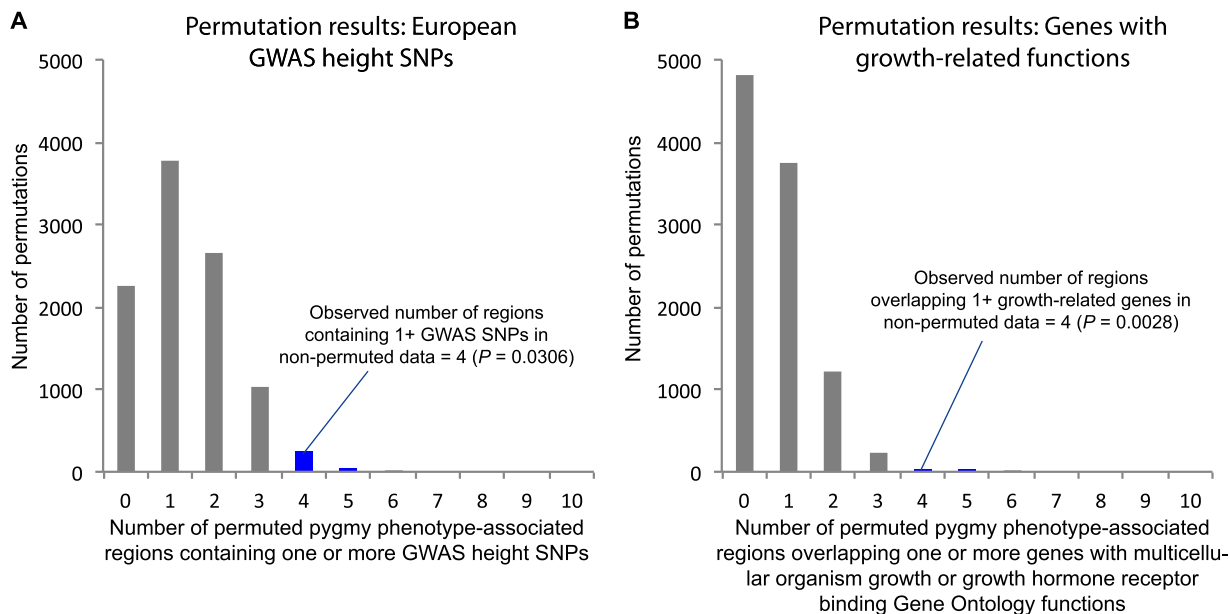

**C** Summary of all permutation analyses performed with GWAS SNPs and GO genes

| # pygmy phenotype-associated regions | Comparison dataset                                                            | # of SNPs/ regions in comparison dataset | # of phenotype-associated regions overlapping 1+ test features | Number of permutations (of 10,000) in which N out of the 16 pygmy phenotype associated regions overlapped one or more test features |      |      |      |     |     |    |   |   |   |    | Empirical p-value |   |        |
|--------------------------------------|-------------------------------------------------------------------------------|------------------------------------------|----------------------------------------------------------------|-------------------------------------------------------------------------------------------------------------------------------------|------|------|------|-----|-----|----|---|---|---|----|-------------------|---|--------|
|                                      |                                                                               |                                          |                                                                | 0                                                                                                                                   | 1    | 2    | 3    | 4   | 5   | 6  | 7 | 8 | 9 | 10 |                   |   |        |
| 16                                   | European height GWAS SNPs                                                     | 453                                      | 4                                                              | 2262                                                                                                                                | 3763 | 2643 | 1026 | 253 | 46  | 7  | 0 | 0 | 0 | 0  | 0                 | 0 | 0.0306 |
| 16                                   | IgG glycosylation GWAS SNPs                                                   | 699                                      | 1                                                              | 1118                                                                                                                                | 2882 | 3189 | 1870 | 734 | 174 | 29 | 4 | 0 | 0 | 0  | 0                 | 0 | 0.8882 |
| 16                                   | Crohn's disease GWAS SNPs                                                     | 210                                      | 0                                                              | 4216                                                                                                                                | 3935 | 3508 | 296  | 41  | 4   | 0  | 0 | 0 | 0 | 0  | 0                 | 0 | 1      |
| 16                                   | Type 2 diabetes GWAS SNPs                                                     | 207                                      | 1                                                              | 5607                                                                                                                                | 3407 | 868  | 106  | 12  | 0   | 0  | 0 | 0 | 0 | 0  | 0                 | 0 | 0.4393 |
| 16                                   | Multiple Sclerosis GWAS SNPs                                                  | 175                                      | 0                                                              | 4490                                                                                                                                | 3807 | 1352 | 314  | 32  | 5   | 0  | 0 | 0 | 0 | 0  | 0                 | 0 | 1      |
| 16                                   | BMI GWAS SNPs                                                                 | 110                                      | 0                                                              | 6130                                                                                                                                | 3131 | 654  | 74   | 11  | 0   | 0  | 0 | 0 | 0 | 0  | 0                 | 0 | 1      |
| 16                                   | Genes with multicellular organism growth Gene Ontology functions (GO0040014)  | 78                                       | 3                                                              | 6023                                                                                                                                | 3205 | 691  | 77   | 4   | 0   | 0  | 0 | 0 | 0 | 0  | 0                 | 0 | 0.0081 |
| 16                                   | Genes with growth hormone receptor binding Gene Ontology function (GO0060396) | 30                                       | 2                                                              | 7710                                                                                                                                | 2057 | 217  | 14   | 2   | 0   | 0  | 0 | 0 | 0 | 0  | 0                 | 0 | 0.0233 |
| 16                                   | Combined genes in GO0040014 and GO0060396                                     | 101                                      | 4                                                              | 4807                                                                                                                                | 3738 | 1209 | 218  | 25  | 2   | 1  | 0 | 0 | 0 | 0  | 0                 | 0 | 0.0028 |
| 16                                   | Batwa extreme iHS regions                                                     | 105                                      | 1                                                              | 5003                                                                                                                                | 3567 | 1189 | 208  | 27  | 6   | 0  | 0 | 0 | 0 | 0  | 0                 | 0 | 0.4997 |

**D** Summary of all permutation analyses performed with Fst and iHS data

| Pygmy phenotype associated regions | # regions | Statistic | Population       | # genome-wide SNPs | Actual data       |                                |                                        |                                                            | Permutations   |                                                                        |                                                                       |                   |
|------------------------------------|-----------|-----------|------------------|--------------------|-------------------|--------------------------------|----------------------------------------|------------------------------------------------------------|----------------|------------------------------------------------------------------------|-----------------------------------------------------------------------|-------------------|
|                                    |           |           |                  |                    | # SNPs in regions | Median Fst or  iHS  in regions | Median Fst or  iHS  outside of regions | Fst or  iHS  inside regions - Fst or  iHS  outside regions | # permutations | avg (Fst or  iHS ) inside regions - avg (Fst or  iHS ) outside regions | # permutations with larger inside-outside difference than actual data | Empirical p-value |
| Batwa - FDR 0.25                   | 16        | Fst       | Batwa-Bakiga     | 826589             | 5190              | 0.01596433                     | 0.0138925                              | 0.002071824                                                | 1000           | -0.000193804                                                           | 31                                                                    | 0.031             |
| Batwa - FDR 0.25                   | 16        | Fst       | Batwa-Baka       | 804350             | 5027              | 0.01572692                     | 0.01358969                             | 0.002137231                                                | 1000           | 0.000140935                                                            | 40                                                                    | 0.04              |
| Batwa - FDR 0.25                   | 16        | Fst       | Baka-Nzebi/Nzime | 809564             | 4069              | 0.007728587                    | 0.008541248                            | -0.000812661                                               | 1000           | -3.49E-06                                                              | 809                                                                   | 0.809             |
| Lachance et al. and Jarvis et al.  | 66        | Fst       | Batwa-Bakiga     | 826589             | 640               | 0.01501706                     | 0.01389836                             | 0.001118701                                                | 1000           | 0.00043829                                                             | 412                                                                   | 0.412             |
| Lachance et al. and Jarvis et al.  | 66        | Fst       | Batwa-Baka       | 804350             | 608               | 0.01421534                     | 0.01359129                             | 0.000624048                                                | 1000           | 0.000495335                                                            | 433                                                                   | 0.433             |
| Lachance et al. and Jarvis et al.  | 66        | Fst       | Baka-Nzebi/Nzime | 809564             | 621               | 0.01753567                     | 0.008538085                            | 0.008997585                                                | 1000           | 0.000240872                                                            | 0                                                                     | 0                 |
| Batwa - FDR 0.25                   | 16        | iHS       | Batwa            | 670543             | 3985              | 0.782858                       | 0.67489                                | 0.107968                                                   | 1000           | -0.002853879                                                           | 62                                                                    | 0.062             |
| Batwa - FDR 0.25                   | 16        | iHS       | Bakiga           | 745829             | 4604              | 0.6595975                      | 0.671036                               | -0.0114385                                                 | 1000           | -0.000433612                                                           | 629                                                                   | 0.629             |
| Batwa - FDR 0.25                   | 16        | iHS       | Baka             | 693983             | 4303              | 0.648094                       | 0.684587                               | -0.036493                                                  | 1000           | 0.002887768                                                            | 820                                                                   | 0.82              |
| Batwa - FDR 0.25                   | 16        | iHS       | Nzebi/Nzime      | 747898             | 4613              | 0.686978                       | 0.67253                                | 0.014448                                                   | 1000           | -0.004692952                                                           | 218                                                                   | 0.218             |
| Lachance et al. and Jarvis et al.  | 66        | iHS       | Batwa            | 670543             | 486               | 0.706432                       | 0.675238                               | 0.030904                                                   | 1000           | 0.0226089                                                              | 414                                                                   | 0.414             |
| Lachance et al. and Jarvis et al.  | 66        | iHS       | Bakiga           | 693983             | 472               | 0.851274                       | 0.684242                               | 0.167032                                                   | 1000           | 0.00689946                                                             | 10                                                                    | 0.01              |
| Lachance et al. and Jarvis et al.  | 66        | iHS       | Baka             | 745829             | 541               | 0.842882                       | 0.670839                               | 0.172043                                                   | 1000           | 0.01433248                                                             | 10                                                                    | 0.01              |
| Lachance et al. and Jarvis et al.  | 66        | iHS       | Nzebi/Nzime      | 747898             | 542               | 0.8324985                      | 0.6725295                              | 0.159969                                                   | 1000           | 0.005571687                                                            | 6                                                                     | 0.006             |

**Fig. S2.** Observed and permuted distributions of the number of pygmy phenotype-associated regions that overlap European genome-wide association study (GWAS) height SNPs or genes with growth and development functions, and permutation analyses of  $F_{ST}$  and absolute  $iHS$  values within and outside of pygmy phenotype-associated regions. (A–C) We used permutation analyses to test the significance of observed overlaps between the 16 Batwa pygmy phenotype-associated regions and various GWAS SNP and functional gene datasets. Briefly, we created 10,000 sets of size-matched regions (*Methods*) and determined the number of regions in each permutation that overlapped at least one feature from a tested dataset. (A) Distribution of the number of permuted pygmy phenotype associated regions that contain one or more European stature GWAS SNPs. Permutations in which an equal or greater number of regions contained  $\geq 1$  GWAS height SNP as that observed in the actual 16 pygmy phenotype associated regions (1) are highlighted in blue. The empirical  $P$  value ( $P = 0.0306$ ) was determined based on the total number of permutations with an equal or greater number of regions containing  $\geq 1$  GWAS SNP. (B) Distribution of the number of permuted regions that overlap one or more genes with multicellular organism growth or growth hormone receptor binding Gene Ontology functions compared with the number of actual regions observed to overlap 1+ such genes (4;  $P = 0.0028$ ). (C) Summary of all permutation analyses performed, with the counts of permutation observations equal to or greater than the observed result from the actual data highlighted in blue, and significant  $P$  values ( $< 0.05$ ) highlighted in red. (D) We also used permutation analyses to test the significance of the difference between median  $F_{ST}$  and  $|iHS|$  values within pygmy phenotype-associated regions—both the 16 Batwa pygmy phenotype-associated regions identified by our admixture mapping approach and the 66 stature-associated regions for west central African rainforest hunter-gatherers reported by Jarvis et al. (2) and Lachance et al. (3)—compared with the rest of the genome. As above, we created 1,000 sets of size-matched regions (*Methods*) and determined  $F_{ST}$  and  $|iHS|$  values within and outside these regions in each permuted dataset compared with the observed actual values.

1. Patin E, et al. (2014) The impact of agricultural emergence on the genetic history of African rainforest hunter-gatherers and agriculturalists. *Nat Commun* 5:3163.
2. Jarvis JP, et al. (2012) Patterns of ancestry, signatures of natural selection, and genetic association with stature in Western African pygmies. *PLoS Genet* 8(4):e1002641.
3. Lachance J, et al. (2012) Evolutionary history and adaptation from high-coverage whole-genome sequences of diverse African hunter-gatherers. *Cell* 150(3):457–469.

BayeScan Batwa vs. Bakiga results, including candidate positive selection regions

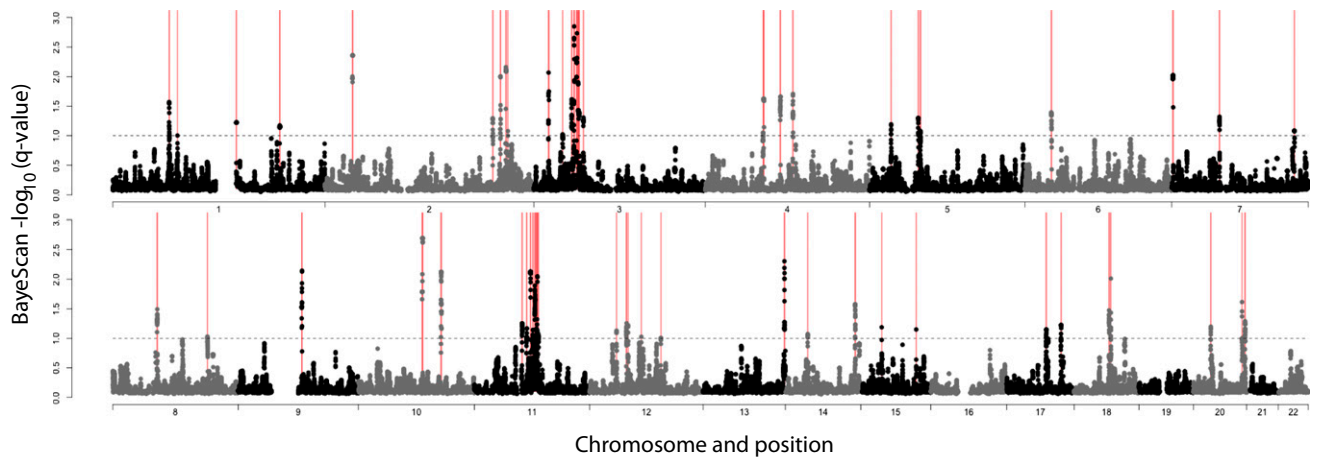

**Fig. S3.** Candidate regions targeted by positive selection identified by BayeScan. Manhattan plot showing the negative  $\log_{10} q$  values (y axis), indicating the level of support for a history of positive selection at the locus, for all genome-wide SNPs with a minor allele frequency (MAF)  $>5\%$ . The red lines indicate the regions identified by our sliding-window approach as harboring an excess of highly differentiated SNPs (i.e., SNPs with  $q$  values  $<0.1$ ).



**A** Genome-wide relationship between Bakiga vs Batwa  $F_{ST}$  levels and  $|iHS|$  in the Batwa

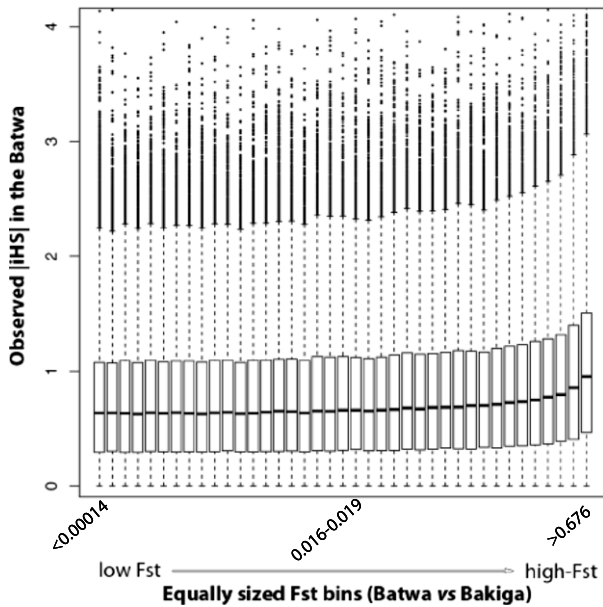

**B** Empirical evaluation of the expected changes in median  $|iHS|$  as a function of changes in  $F_{ST}$

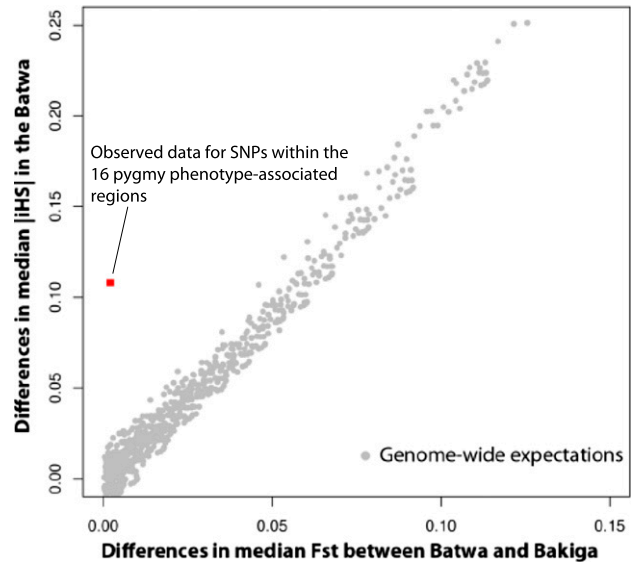

**Fig. S5.** Empirical evaluation of the expected changes in median  $|iHS|$  as a function of changes in  $F_{ST}$ . (A) Genome-wide correlation between Bakiga vs. Batwa  $F_{ST}$  (x axis) and absolute  $iHS$  values in the Batwa population (y axis). Genome-wide patterns are expected to primarily reflect demographic events, and, to a lesser degree, the effects of natural selection. We observed a significant genome-wide correlation between Batwa vs. Bakiga  $F_{ST}$  and  $|iHS|$  values in the Batwa, albeit only explaining a very small proportion of the variance ( $r^2 = 0.011$ ;  $P < 0.01$ ). The association is driven principally by high- $F_{ST}$  SNPs, which suggests that some of the signal is likely due to natural selection rather than demography alone. (B) Expected changes in absolute  $iHS$  values in the Batwa population (y axis) given changes in Bakiga vs. Batwa  $F_{ST}$  values. Based on the genome-wide correlation shown in A, we calculated the expected changes in median  $iHS$  values in the Batwa as a function of increased  $F_{ST}$  values between the Batwa and the Bakiga (gray dots). The red square shows the pattern observed when contrasting SNPs within the Batwa pygmy phenotype-associated regions than the remainder of the genome. This result suggests that the genome-wide correlation between  $|iHS|$  and  $F_{ST}$  values is too small to account for the observed increase in  $|iHS|$  within the Batwa pygmy phenotype-associated regions.

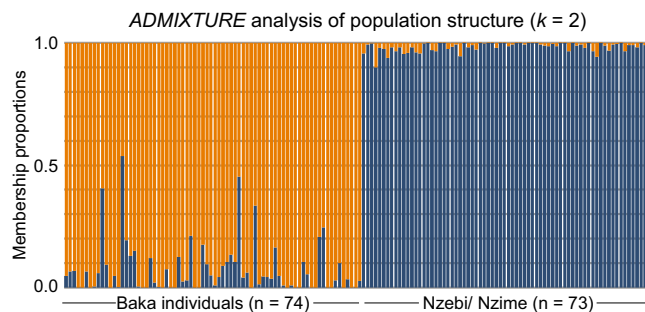

**Fig. S6.** ADMIXTURE results for the Baka and Nzebi/Nzime populations. Population structure analysis based on autosomal SNPs. Each individual is represented as a vertical line, with population origins indicated below the lines. Cluster membership proportions are depicted in orange (inferred proportion of Baka ancestry) and blue (inferred proportion of Nzebi/Nzime ancestry).



**Dataset S2. Genomic regions associated with the pygmy phenotype in Batwa east central African rainforest hunter-gathers**

[Dataset S2](#)

**Dataset S3. Summary of genomic regions harboring potential signatures of strong, recent positive selection based on iHS and BayeScan results, and Gene Ontology enrichment results**

[Dataset S3](#)

**Dataset S4. Genomic regions previously reported to be associated with the pygmy phenotype in west central African rainforest hunter-gathers**

[Dataset S4](#)
